# Supplementary material for: Colorimetric and fluorometric dual-mode determination of hypochlorite based on redox-mediated quenching
Source: Royal Society of Chemistry journal article supplement (doi:10.1039/d3ra05870k), 2023-01-01
Supplement: d3ra05870k1.pdf [file d3ra05870k1.pdf]

## Electronic Supplementary Material

### Colorimetric and fluorometric dual-mode determination of hypochlorite based on redox-mediated quenching

Ali O. AlQarni<sup>a</sup>, Ashraf M. Mahmoud<sup>a</sup>, Ramadan Ali<sup>b,c,\*</sup>, Mohamed, M. El-  
Wekil<sup>d\*</sup>

<sup>a</sup> Department of Pharmaceutical Chemistry, College of Pharmacy, Najran University, Najran, 11001, Saudi Arabia

<sup>b</sup> Department of Pharmaceutical Chemistry, Faculty of Pharmacy, University of Tabuk, Tabuk71491, Saudi Arabia

<sup>c</sup> Department of Pharmaceutical Analytical Chemistry, Faculty of Pharmacy, Al Azhar University, Assiut Branch, 71526, Egypt

<sup>d</sup> Department of Pharmaceutical Analytical Chemistry, Faculty of Pharmacy, Assiut University, Assiut, 71526, Egypt

\*Ramadan Ali: [r\\_ali@ut.edu.sa](mailto:r_ali@ut.edu.sa)

\*Mohamed M. El-Wekil: [mohamed.elwakeel@pharm.aun.edu.eg](mailto:mohamed.elwakeel@pharm.aun.edu.eg),  
[mohamed.mohamoud@ymail.com](mailto:mohamed.mohamoud@ymail.com)

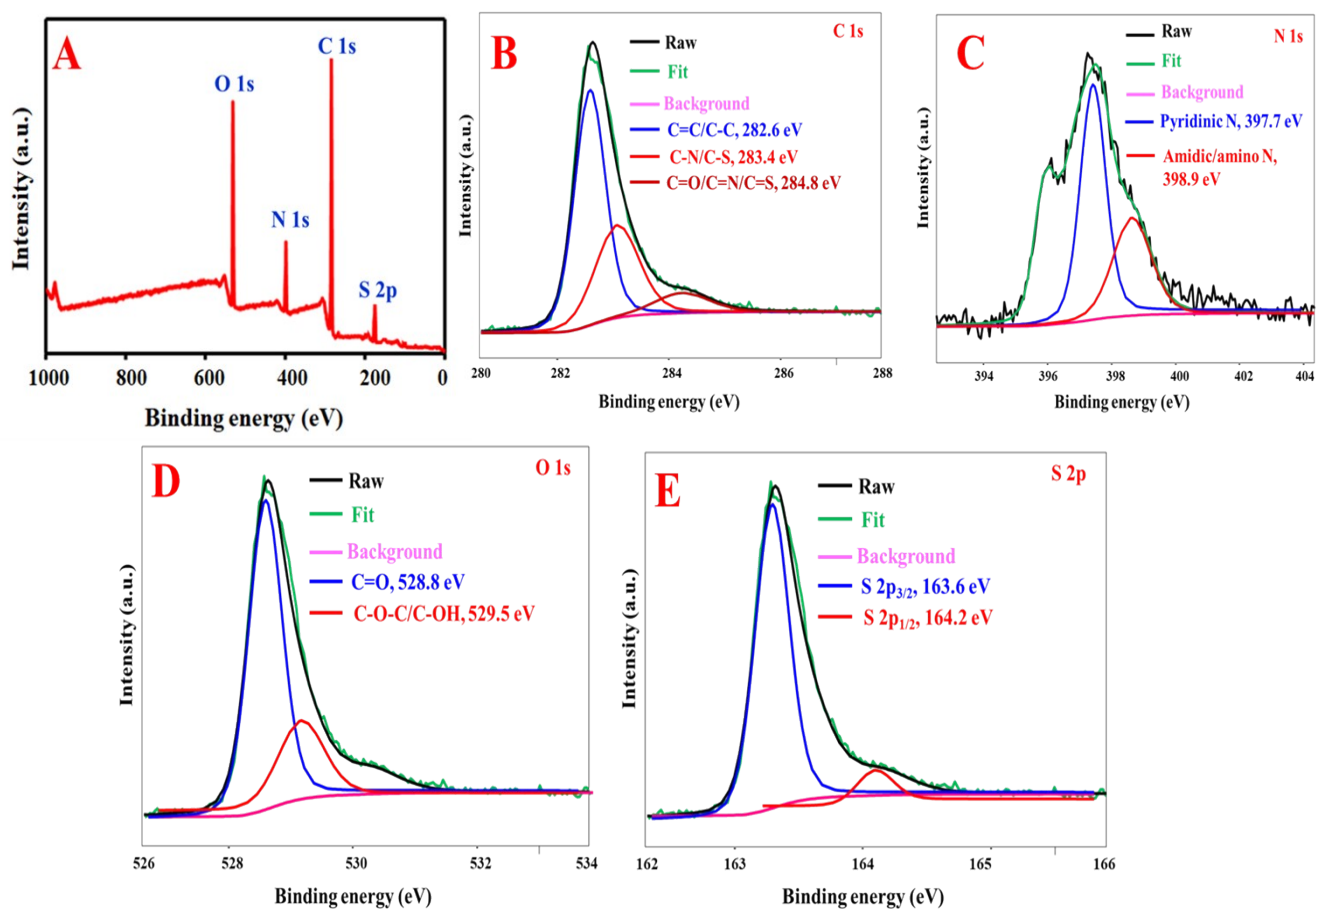

**Fig.S1** (A) Full XPS spectrum of N, S@ g-CDs while (B), (C), (D), and (E) represents detailed XPS of C 1s, N 1s, O 1s, and S 2p, respectively.

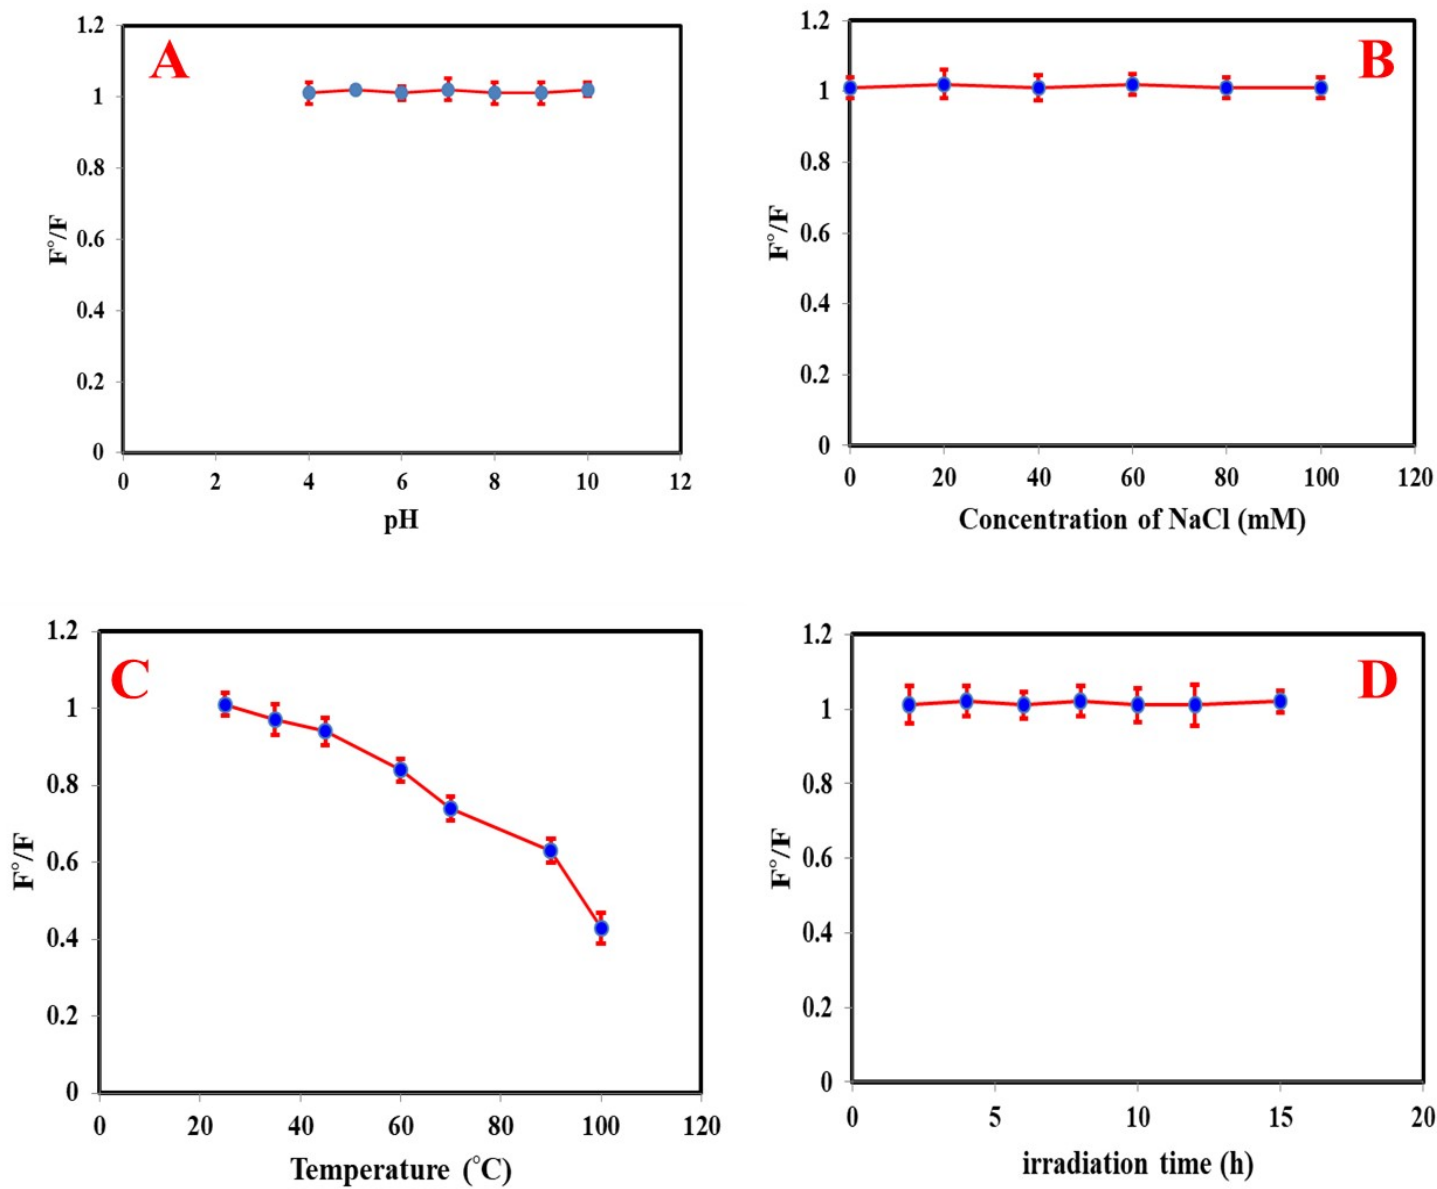

**Fig.S2** The effect of pH (A), concentration of NaCl (B), temperature (C), and irradiation time (D) on the stability of N, S@g-CDs.

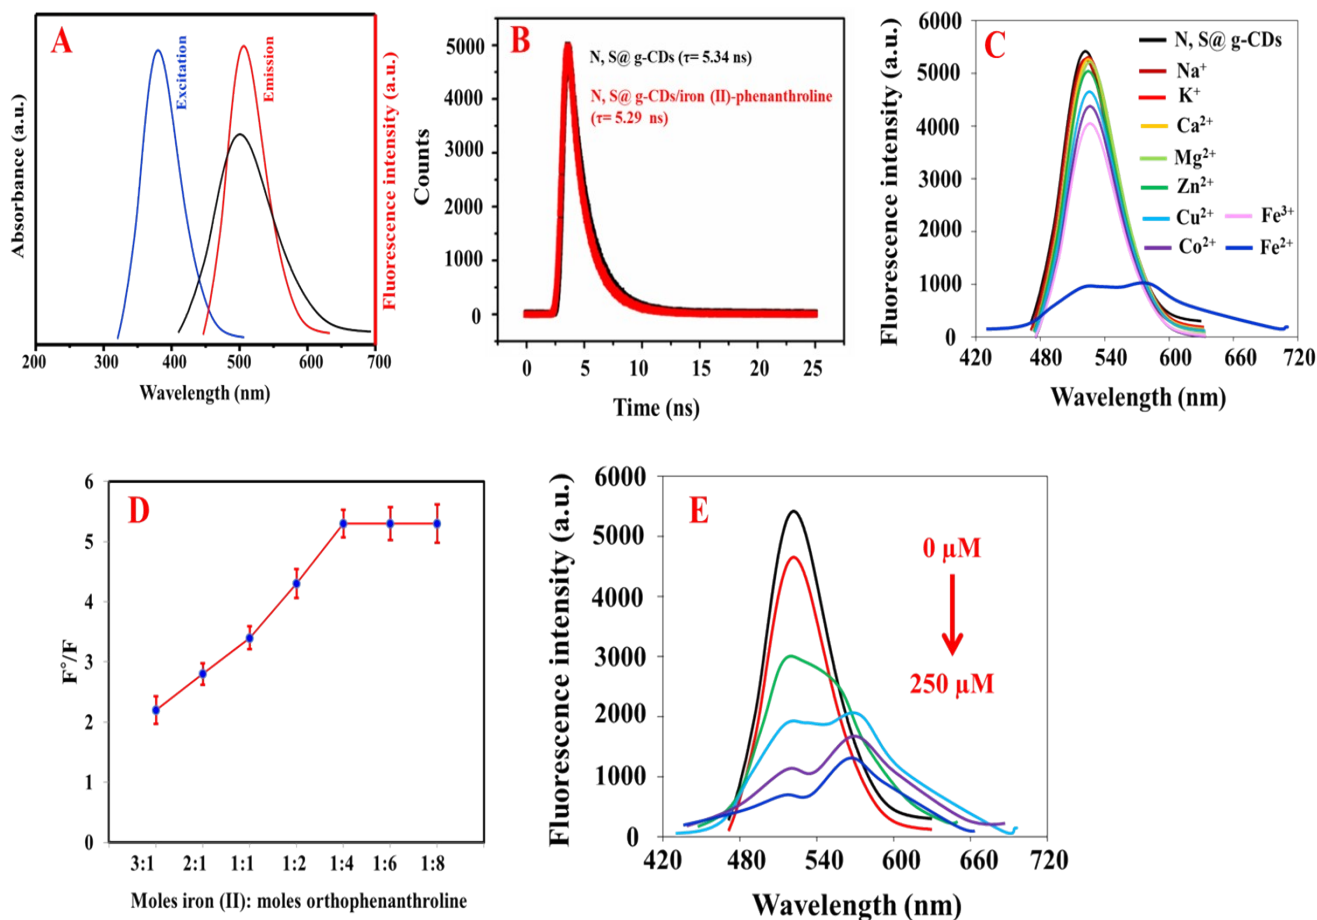

**Fig.S3** (A) Absorption spectrum (black line) of iron (II)-orthophenanthroline chelate and excitation/emission spectra of N, S@ g-CDs; (B) Fluorescence lifetimes of N, S@ g-CDs before and after addition of iron (II): orthophenanthroline; (C) Specificity of orthophenanthroline towards different metal cations; (D) Effect of iron (II): orthophenanthroline ratios on the fluorescence responses of N, S@ g-CDs; (E) Effect of iron (II) concentrations on the fluorescence responses of N, S@ g-CDs.

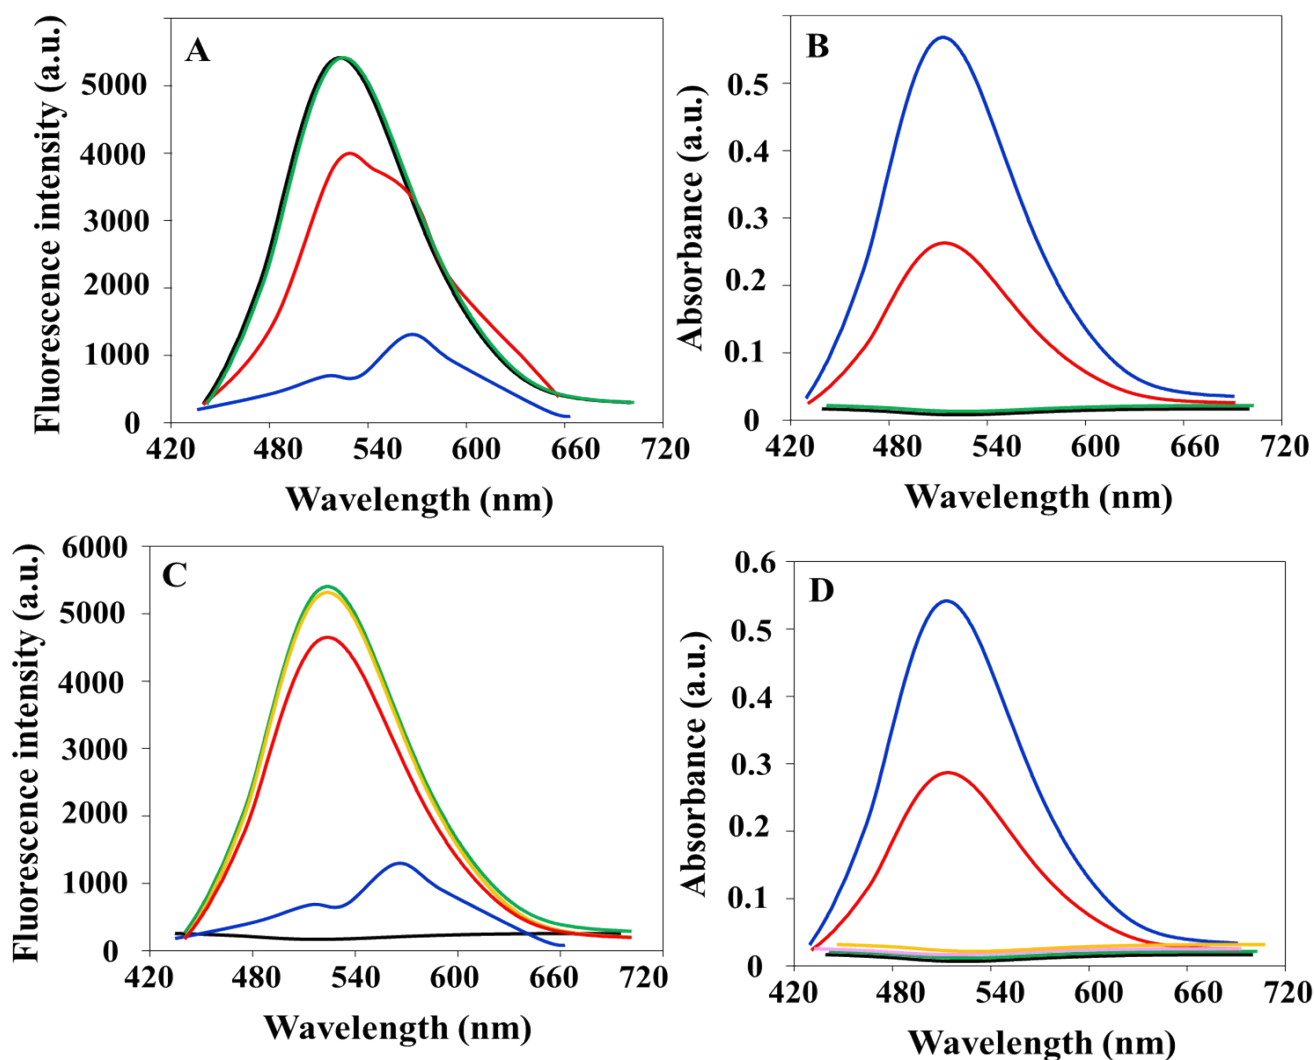

**Fig.S4** (A) Fluorescence spectra of N, S@ g-CDs (black), orthophenanthroline/ N, S@ g-CDs (green), iron (II)- orthophenanthroline/ N, S@ g-CDs (blue), iron (II)+ ClO<sup>-</sup>+orthophenanthroline/ N, S@ g-CDs (red); (B) Fluorescence spectra of iron (II)- orthophenanthroline (black), N, S@ g-CDs (green), N, S@ g-CDs/ orthophenanthroline (orange), iron (II)/ N, S@ g-CDs (red), iron (II)- orthophenanthroline/ N, S@ g-CDs (blue); (C) Absorption spectra of N, S@ g-CDs (black), orthophenanthroline/ N, S@ g-CDs (green), iron (II)- orthophenanthroline/ N, S@ g-CDs (blue), iron (II)+ ClO<sup>-</sup>+orthophenanthroline/ N, S@ g-CDs (red); (D) Absorption spectra of orthophenanthroline (black), iron (III)- orthophenanthroline (green), iron (II)- orthophenanthroline (blue), iron (II)+ ClO<sup>-</sup>+orthophenanthroline (red), iron (III)+ ClO<sup>-</sup>+orthophenanthroline (orange).

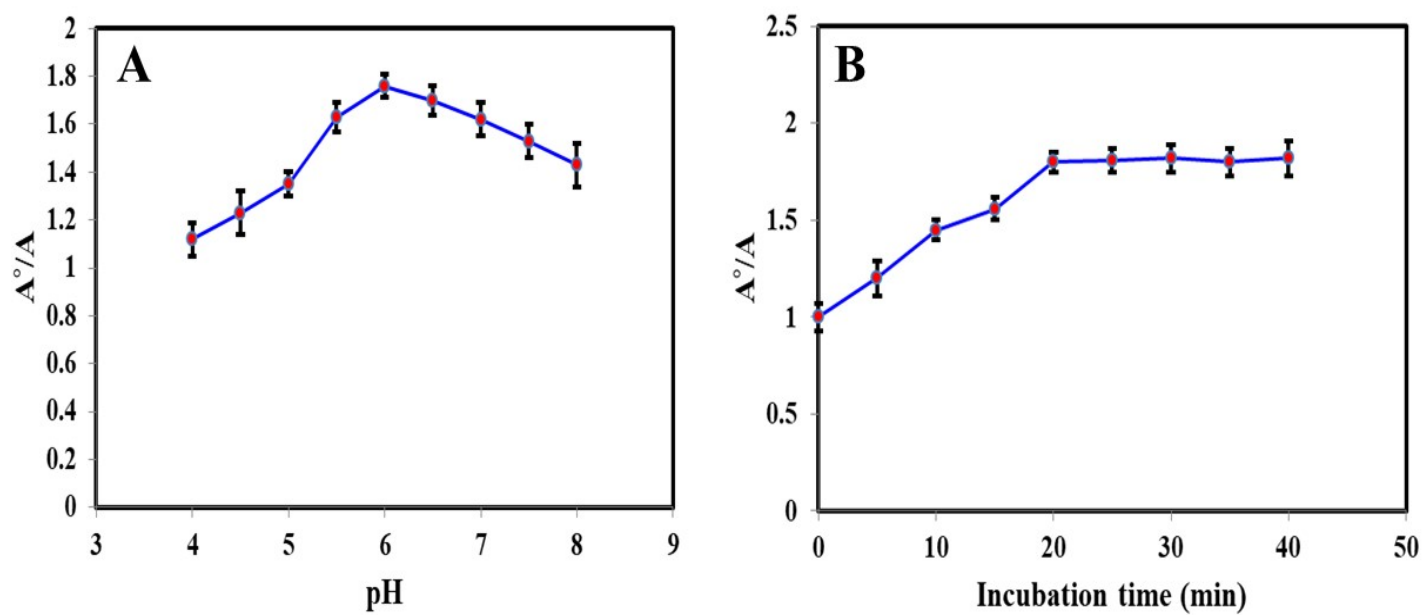

**Fig.S5** The effect of pH (A) and incubation time (B) on the colorimetric determination of 50  $\mu\text{M}$   $\text{ClO}^-$  anion.
